# Supplementary material for: miRNA164-directed cleavage of ZmNAC1 confers lateral root development in maize (Zea mays L.)
Source: PubMed Central journal article supplement (PMC3554535; doi:10.1186/1471-2229-12-220), 2012-11-21
Supplement: 1471-2229-12-220-S1.pdf [file 1471-2229-12-220-S1.pdf]

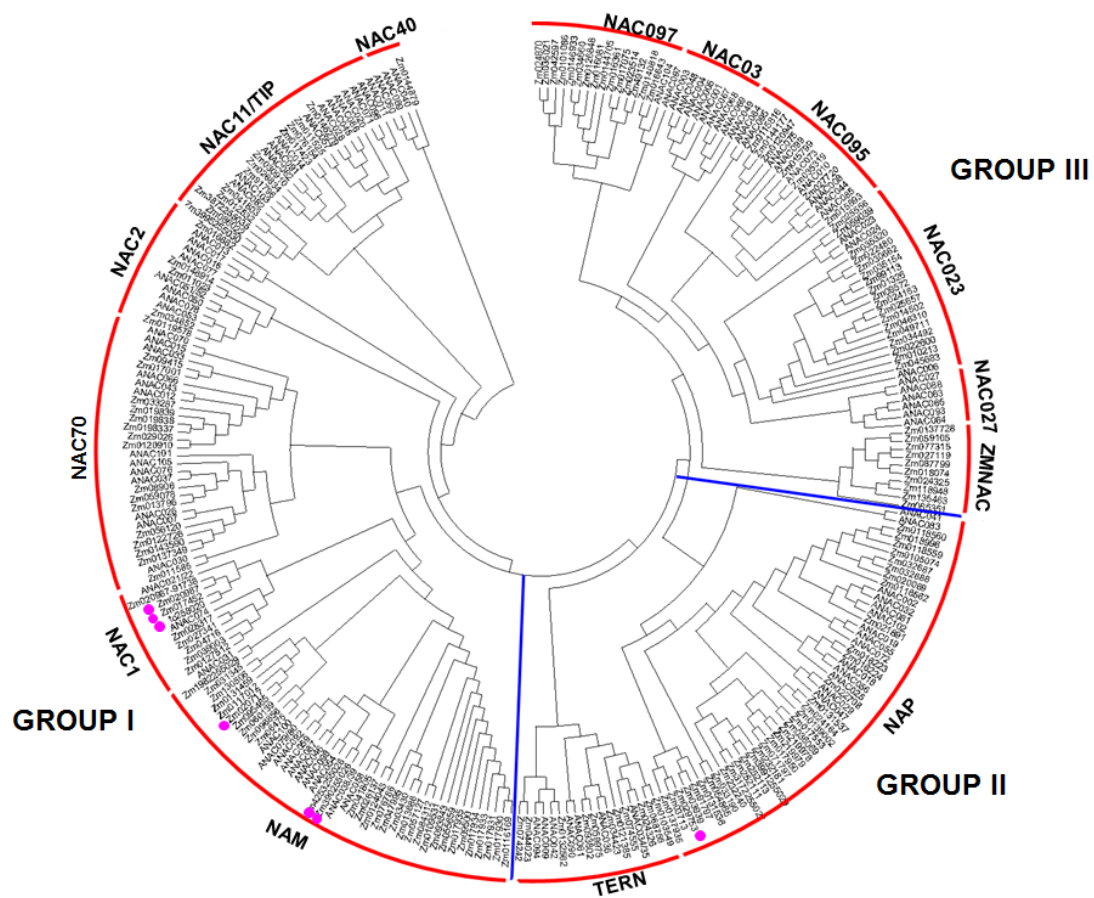

**Additional file 1. Polygenetic tree of 175 maize NAC and 105 *Arabidopsis* NAC proteins**

The unrooted phylogenetic tree of NAC proteins was constructed using the CLUSTAL X program with the neighbor-joining method. In this figure, 105 *Arabidopsis* NAC proteins and 175 maize NAC proteins are classified into three large groups, separated by blue lines. Red arcs represent 14 subgroups and pink dots denote putative miR164 target genes in maize. The sequences of 105 *Arabidopsis* NAC proteins are from reference [3].
