# Supplementary material for: miRNA164-directed cleavage of ZmNAC1 confers lateral root development in maize (Zea mays L.)
Source: PubMed Central journal article supplement (PMC3554535; doi:10.1186/1471-2229-12-220), 2012-11-21
Supplement: 1471-2229-12-220-S2.pdf [file 1471-2229-12-220-S2.pdf]

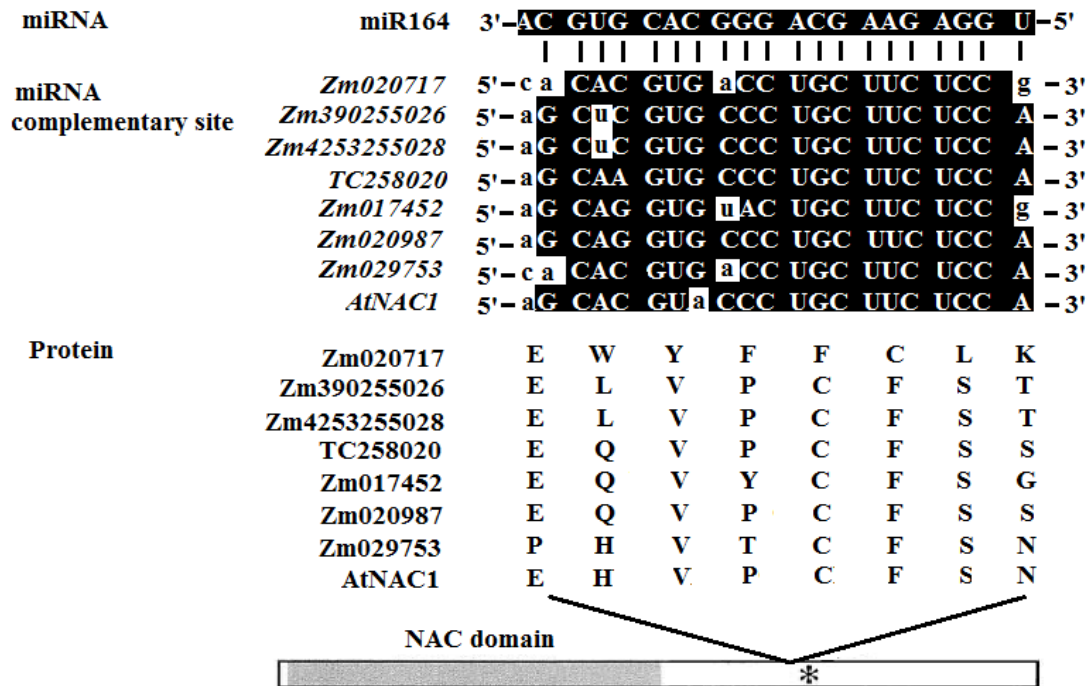

**Additional file 2. Putative ZmNACs were obtained as the putative miR164 target genes**

This figure shows the reverse complementary site for mature miR164 and 7 ZmNACs.
