# Supplementary material for: miRNA164-directed cleavage of ZmNAC1 confers lateral root development in maize (Zea mays L.)
Source: PubMed Central journal article supplement (PMC3554535; doi:10.1186/1471-2229-12-220), 2012-11-21
Supplement: 1471-2229-12-220-S4.pdf [file 1471-2229-12-220-S4.pdf]

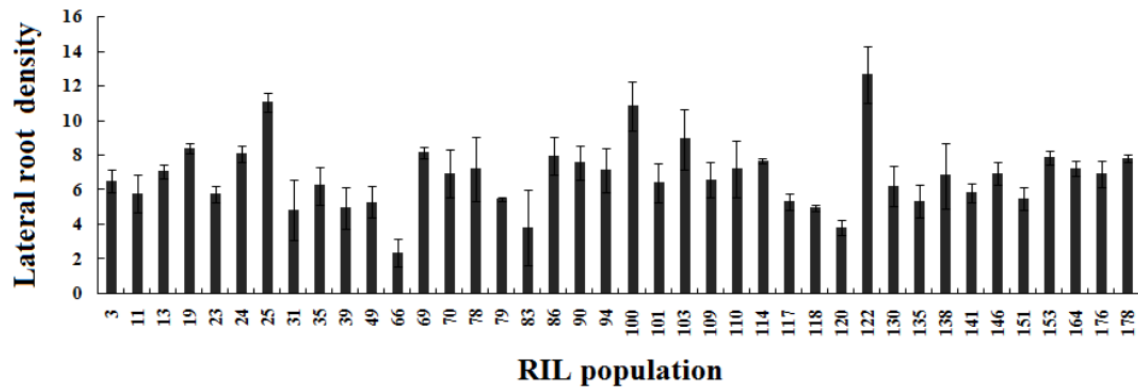

### Analysis of Variance

| Different source | SS     | df  | MS    | F    | P-value  | F crit |
|------------------|--------|-----|-------|------|----------|--------|
| Genotypes        | 441.74 | 39  | 11.33 | 7.95 | 3.84E-15 | 1.55   |
| Errors           | 113.94 | 120 | 1.42  |      |          |        |
| Total            | 555.68 | 159 |       |      |          |        |

#### Additional file 4. The investigation of lateral root numbers among RILs

The figure shows the variation of lateral root density among RILs. 40 RILs were investigated 8 days after germination, 4 plants per genotype were investigated for lateral root density. Lateral root numbers in primary root were counted manually and was divided by the total length of the primary root as a parameter for lateral root density (De Smet et al. 2012). Analysis of variance for the lateral root density among 40 RILs were performed .
