# Supplementary material for: miRNA164-directed cleavage of ZmNAC1 confers lateral root development in maize (Zea mays L.)
Source: PubMed Central journal article supplement (PMC3554535; doi:10.1186/1471-2229-12-220), 2012-11-21
Supplement: 1471-2229-12-220-S8.pdf [file 1471-2229-12-220-S8.pdf]

```

87-1 ATCTCTCCATCTTCGTCCACCCCATACCGCGCGCCCGCCGCTTTTATACCTGCATATGCACAAAAGCTAGCTATGGCGTGCTAGGAGTACTACTACTTTGGC 100
Zong3 ATCTCTCCATCTTCGTCCACCCCATACCGCGCGCCCGCCGCTTTTATACCTGCATATGCACAAAAGCTAGCTATGGCGTGCTAGGAGTACTACTACTTTGGC

87-1 AACTGCCAGCAGGAGGCAGCAGCAGGGCTGGCATGTATATCAAGGGCGCTTTAATGCCAGCAGGGGAAGAAATCGCTGCGCGTACAGGCTCAATGTTAGC 200
Zong3 AACTGCCAGCAGGAGGCAGCAGCAGGGCTGGCATGTATATCAAGGGCGCTTTAATGCCAGCAGGGGAAGAAATCGCTGCGCGTACAGGCTCAATGTTAGC

87-1 CTGTGCGTTCTTGTGTGTGCGGCTGACACGTGGACCACTCTCCGAAGCCAGCTAGCTAGTAGCGAACATTTTTTTTTTTTGTAGGCGTATTGCAAA 300
Zong3 CTGTGCGTTCTTGTGTGTGCGGCTGACACGTGGACCACTCTCCGAAGCCAGCTAGCTAGTAGCGAACATTTTTTTTTTTTGTAGGCGTATTGCAAA

87-1 TGGCGACAAGTGTACTAGAGTATATTATACTACTAGAGGGGAGGGGGGCAGAAACATAAATAGGAATAGTAGTCTTTTTTGTGCTATACAGACAT 400
Zong3 TGGCGACAAGTGTACTAGAGTATATTATACTACTAGAGGGGAGGGGGGCAGAAACATAAATAGGAATAGTAGTCTTTTTTGTGCTATACAGACAT

87-1 AAATACGTGCAGTGGTGTGAGTGGACGCTCCATTATCCCTGGATGGATGGATCGGACTTTGTGAGTGCACAACAGCCACATGCTGAATTGTACACACATG 500
Zong3 AAATACGTGCAGTGGTGTGAGTGGACGCTCCATTATCCCTGGATGGATGGATCGGACTTTGTGAGTGCACAACAGCCACATGCTGAATTGTACACACATG

87-1 CATGTGTGTGCCGTGTGGCGGAGATGAACAATGAGTAGTGAATTCGTCTCTCGGATCGATTAGGCCGGCGAAGCGAAGATCGACGGAGATACTAATCGGT 600
Zong3 CATGTGTGTGCCGTGTGGCGGAGATGAACAATGAGTAGTGAATTCGTCTCTCGGATCGATTAGGCCGGCGAAGCGAAGATCGACGGAGATACTAATCGGT

87-1 TGTATGTAGCGCGCTCGTGCATCAGCAGCGCGGGAATGACTGAGTGAAGCATGATGACACCATGCACATATCGCCGTCTGAGCTACCCGCGCCTAACA 700
Zong3 TGTATGTAGCGCGCTCGTGCATCAGCAGCGCGGGAATGACTGAGTGAAGCATGATGACACCATGCACATATCGCCGTCTGAGCTACCCGCGCCTAACA

87-1 AAGCCTGCCACCTGGCTTCGGCACACTACCCAAAGAAAAGTCTCTCTCTTTCCTCTCTCTAGCTAGCCCCGATCTGGCCCTCTCTCTCACGCGCTCA 800
Zong3 AAGCCTGCCACCTGGCTTCGGCACACTACCCAAAGAAAAGTCTCTCTCTTTCCTCTCTCTAGCTAGCCCCGATCTGGCCCTCTCTCTCACGCGCTCA

87-1 GAACTAGAAGGGCATCCGCAGAAAGTTGACCAAGTACAGCAGCGCGCAGCGCGGGCTCTCTCTGTTTATATAAGCCCCCTCTGCGCGCTCTCCAGCTTCTT 900
Zong3 GAACTAGAAGGGCATCCGCAGAAAGTTGACCAAGTACAGCAGCGCGCAGCGCGGGCTCTCTCTGTTTATATAAGCCCCCTCTGCGCGCTCTCCAGCTTCTT

```

**Additional file 8. Comparison of the *ZmNAC1* promoter between 87-1 and Zong3**

This figure shows that no large variation exists in the 1 kB region of the *ZmNAC1* promoter between two inbred lines, with the exception of one SNP.
